# Supplementary material for: Catalytic fast pyrolysis of biomass: superior selectivity of hierarchical zeolites to aromatics
Source: Royal Society of Chemistry journal article supplement (doi:10.1039/c7gc02309j), 2017-01-01
Supplement: c7gc02309j1.pdf [file c7gc02309j1.pdf]

## Catalytic fast pyrolysis of biomass: superior selectivity of hierarchical zeolite to aromatics

L.Y. Jia,<sup>a</sup> M. Raad,<sup>b,c</sup> S. Hamieh,<sup>c</sup> J. Toufaily,<sup>c</sup> T. Hamieh,<sup>c</sup> J. Hertzog,<sup>d</sup> V. Carré,<sup>d</sup> F. Aubriet,<sup>d</sup> M. Bettahar,<sup>a</sup> G. Mauviel,<sup>a</sup> M. Tarrighi,<sup>b</sup> L. Pinard,<sup>\*b</sup>, A. Dufour<sup>\*a</sup>

### Supporting Information:

**Fig. S1** Time profiles of various  $m/z$  markers as analysed by on-line SPI-MS (Parent HZSM-5), a) first injection of wood (injection 1) over fresh catalyst, b) 14<sup>th</sup> injection of wood over coked catalyst

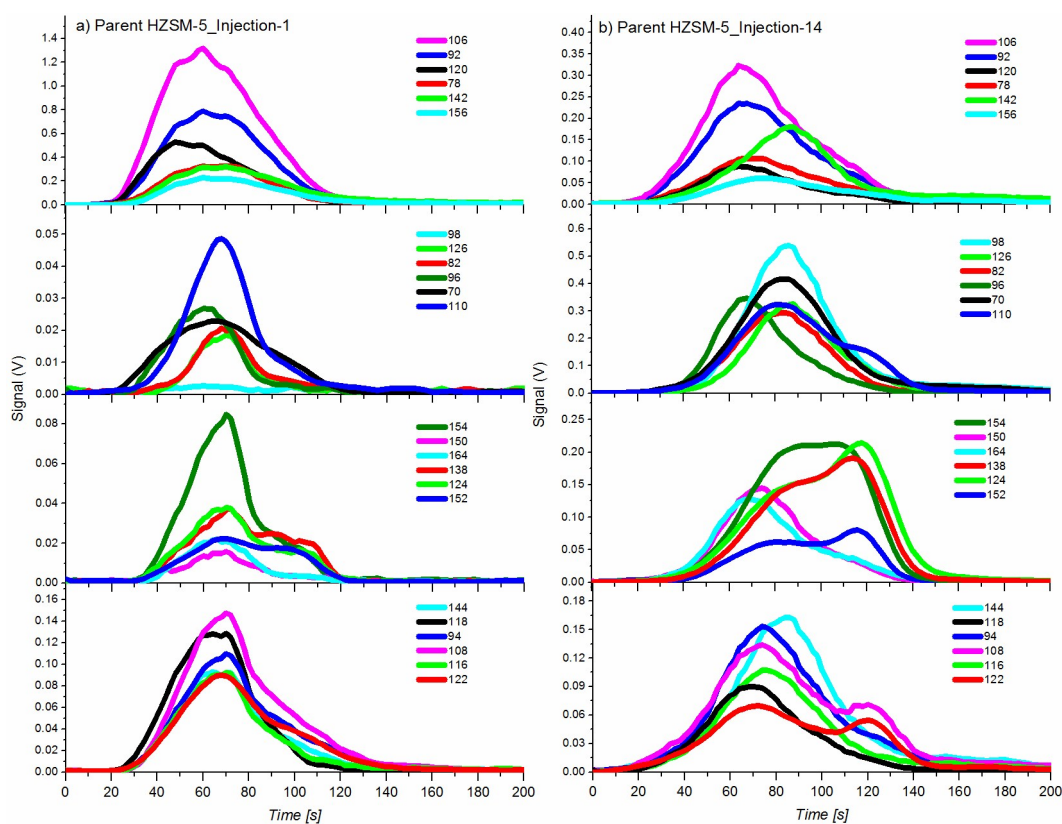



Table S1. Main species identified by GC/MS in bio-oil produced by the CFP of biomass by the 2 zeolites  
Peak numbers refer to the numbers in chromatograms presented in the following figure.

| Label | Retention time (min) | Mw (g/mol) | Name                                                | Chemical structure | Main component as identified by multivariate analysis<br>PC1: hydrocarbons,<br>PC2: intermediates (furans, phenols)<br>PC3 : Primary oxygenated products |
|-------|----------------------|------------|-----------------------------------------------------|--------------------|----------------------------------------------------------------------------------------------------------------------------------------------------------|
| 1     | 4.601                | 82         | 2-methylfuran                                       |                    | 3                                                                                                                                                        |
| 2     | 4.985                | 60         | Acetic acid                                         |                    | 3                                                                                                                                                        |
| 3     | 5.353                | 78         | Benzene                                             |                    | 1                                                                                                                                                        |
| 4     | 5.656                | 84 & 102   | 3-Buten-2-one, 3-methyl & Acrolein, dimethyl acetal |                    | 3                                                                                                                                                        |
| 5     | 6.268                | 96         | Furan, 2,5-dimethyl-                                |                    | 3                                                                                                                                                        |
| 6     | 7.064                | 102        | 2-butanone,4-hydroxy-3-methyl-                      |                    | 3                                                                                                                                                        |
| 7     | 7.579                | 116        | 2-Butene, 1,1-dimethoxy-                            |                    | 3                                                                                                                                                        |
| 8     | 7.934                | 92         | Toluene                                             |                    | 1                                                                                                                                                        |
| 9     | 10.397               | 82 & 96    | 2-Cyclopenten-1-one & Furfural                      |                    | 3                                                                                                                                                        |
| 10    | 11.362               | 106        | Ethylbenzene                                        |                    | 1                                                                                                                                                        |
| 11    | 11.681               | 106        | p-xylene                                            |                    | 1                                                                                                                                                        |
| 12    | 12.401               | 96         | 2-Cyclopentene-1,4-dione                            |                    | 3                                                                                                                                                        |
| 13    | 12.582               | 106/104    | o-Xylene & Styrene                                  |                    | 1                                                                                                                                                        |
| 14    | 15.084               | 120        | Benzene, propyl-                                    |                    | 1                                                                                                                                                        |
| 15    | 15.143               | 142        | Unknown compounds (see supplementary material)      |                    | 3                                                                                                                                                        |
| 16    | 15.390               | 120        | 1-ethyl-4-methylbenzene or 1-ethyl-2-methylbenzene  |                    | 1                                                                                                                                                        |
| 17    | 16.018               | 94         | Phenol                                              |                    | 2                                                                                                                                                        |
| 18    | 16.596               | 120        | 1,2,3-trimethylbenzene or 1,2,4-trimethylbenzene    |                    | 1                                                                                                                                                        |
| 19    | 16.746               | 118        | Benzofuran                                          |                    | 2                                                                                                                                                        |
| 20    | 17.823               | 118        | Benzene, 1-ethenyl-2-methyl-                        |                    | 2                                                                                                                                                        |
| 21    | 18.236               | 118        | Indane                                              |                    | 2                                                                                                                                                        |
| 22    | 18.575               | 116        | Indene                                              |                    | 2                                                                                                                                                        |
| 23    | 18.777               | 108        | Phenol, 2-methyl-                                   |                    | 2                                                                                                                                                        |

|    |        |     |                                        |                                                                                      |     |
|----|--------|-----|----------------------------------------|--------------------------------------------------------------------------------------|-----|
| 24 | 19.528 | 108 | Phenol, 4-methyl-                      | 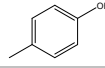   | 2   |
| 25 | 19.907 | 132 | Benzene, 2-ethenyl-1,4-dimethyl-       |    | 2   |
| 26 | 20.155 | 124 | Phenol, 2-methoxy-                     |    | 3   |
| 27 | 20.703 | 132 | Benzofuran, 7-methyl-                  |    | 2   |
| 28 | 20.971 | 132 | Benzofuran, 2-methyl-                  |    | 2   |
| 29 | 21.979 | 132 | 1H-Indene, 2,3-dihydro-5-methyl-       |    | 2   |
| 30 | 22.243 | 122 | Phenol, 2,5-dimethyl-                  |    | 2   |
| 31 | 22.432 | 130 | 1H-Indene, 1-methyl-                   |    | 2   |
| 32 | 22.628 | 130 | 2-Methylindene                         |    | 2   |
| 33 | 22.800 | 122 | Phenol, 2,3-dimethyl-                  |    | 2   |
| 34 | 23.461 | 146 | 1H-Indene, 2,3-dihydro-4,7-dimethyl-   |    | 2   |
| 35 | 23.623 | 128 | Naphthalene                            |    | 1   |
| 36 | 23.723 | 138 | Phenol, 2-methoxy-4-methyl             |    | 3   |
| 37 | 24.545 | 146 | Benzofuran, 4,7-dimethyl-              |   | 2   |
| 38 | 26.009 | 144 | Naphthalene, 1,2-dihydro-4-methyl-     |  | 2   |
| 39 | 26.518 | 152 | Phenol, 4-ethyl-2-methoxy-             |  | 3   |
| 40 | 27.230 | 142 | Naphthalene, 2-methyl                  |  | 1   |
| 41 | 27.617 | 150 | 2-Methoxy-4-vinylphenol                |  | 3   |
| 42 | 28.695 | 154 | Phenol, 2,6-dimethoxy-                 |  | 3   |
| 43 | 30.204 | 156 | Naphthalene, 2-ethyl-                  |  | 1   |
| 44 | 30.542 | 156 | Naphthalene, 1,7-dimethyl-             |  | 1   |
| 45 | 31.463 | 168 | Syringol, 4-methyl                     |  | 2&3 |
| 46 | 31.701 | 164 | Phenol, 2-methoxy-4-(1-propenyl)       |  | 3   |
| 47 | 31.988 | 166 | phenol, 2-methoxy-4-(1-propyl)-        |  | 3   |
| 48 | 33.145 | 162 | $\beta$ -D-Glucopyranose, 1,6-anhydro- |  | 3   |
| 49 | 33.324 | 170 | Naphthalene, 2-(1-methylethyl)-        |  | 1   |

|    |        |             |                                              |                                                                                      |                                  |
|----|--------|-------------|----------------------------------------------|--------------------------------------------------------------------------------------|----------------------------------|
| 50 | 33.639 | 182<br>&144 | Syringol, 4-ethyl, & $\beta$ -naphthol       | 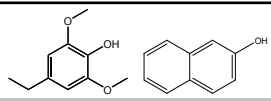   | $m/z$ 182 : 2&3<br>$m/z$ 144 : 2 |
| 51 | 34.708 | 180         | 4-vinylsyringol                              |    | 3                                |
| 52 | 36.400 | 158         | 1-naphthalenol, 2-methyl-                    |    | 2                                |
| 53 | 36.724 | 166         | Fluorene                                     |    | 2                                |
| 54 | 38.171 | 194         | Phenol, 2,6-dimethoxy-4-(2-propenyl)-        |    | 2&3                              |
| 55 | 39.043 | 196         | Ethanone, 1-(4-hydroxy-3,5-dimethoxyphenyl)- |    | 2&3                              |
| 56 | 39.960 | 210         | 2-pentanone, 1-(2,4,6-trihydroxyphenyl)      |    | 2&3                              |
| 57 | 40.900 | 178         | Phenanthrene                                 |    | 2&3                              |
| 58 | 43.664 | 192         | Anthracene, 2-methyl-                        |   | 2&3                              |
| 59 | 44.818 | 208         | 3,5-dimethoxy-4-hydroxycinnamaldehyde        |  | 3                                |

Fig. S4 EIMS of unidentified compound eluted at 15.143min on GC/MS chromatograms

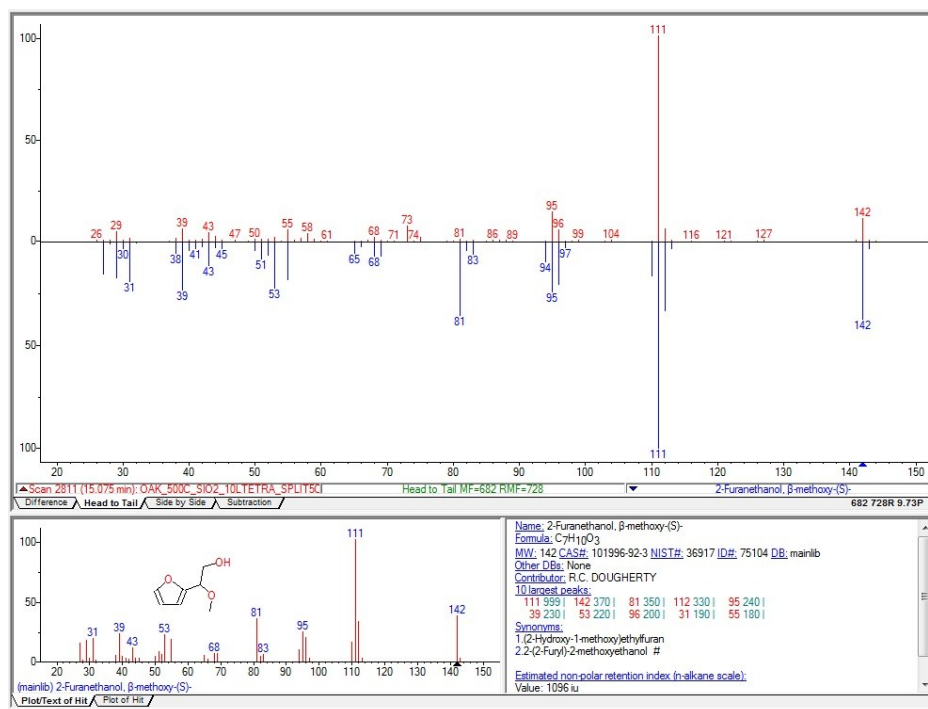

**Fig. S5** GC/MS chromatogram with silica sand in the micro-fluidized bed reactor (no zeolite) and for two zeolites, parent a) injections of wood 1 to 7 and b) injection 8 to 14 and hierarchical c) 1 to 7 and d) 8 to 14.

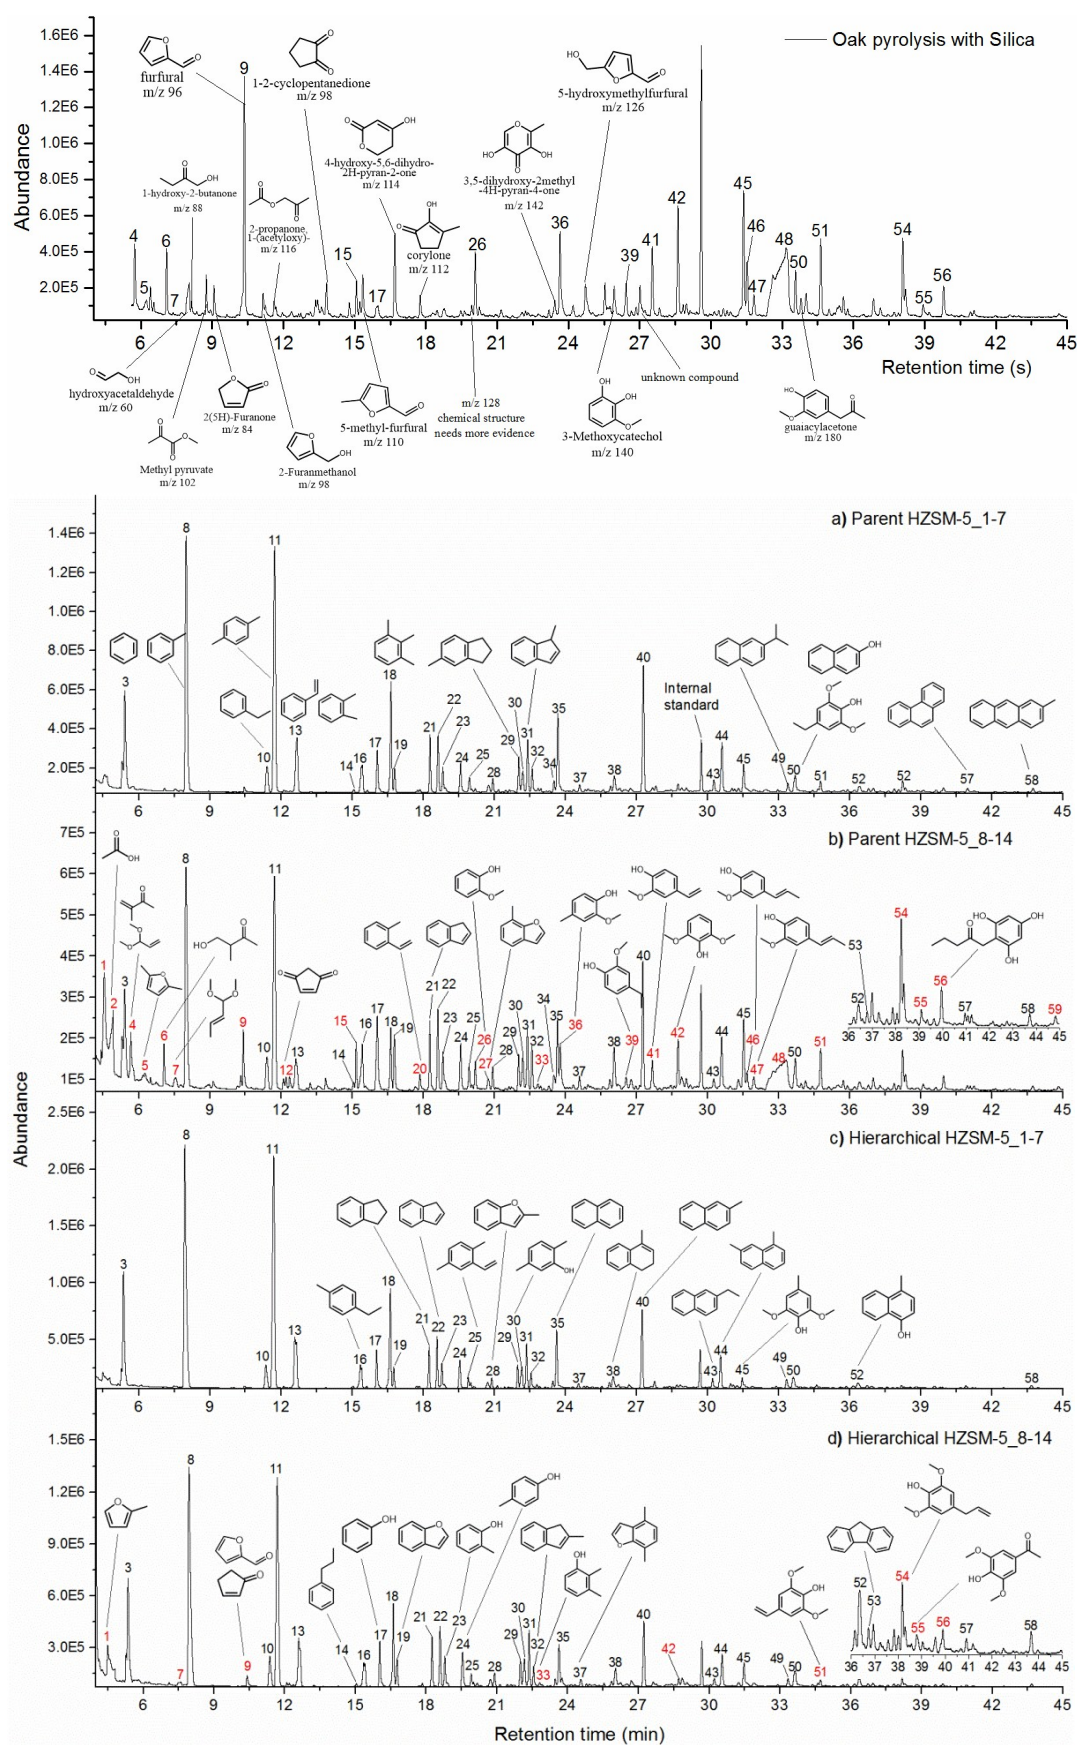

Chromatograms a) and c) present the analysis of the bio-oils accumulated in the cold traps from the first injection of wood (fresh catalyst) to the 7<sup>th</sup> injection (up to a biomass-to-catalyst ratio of 0.85). Chromatograms b) and d) present

the analysis of the bio-oils accumulated in the cold traps from the 8<sup>th</sup> injection (coked catalyst with a biomass-to-catalyst ratio of 0.85) to the 14<sup>th</sup> injection (biomass-to-catalyst ratio 1.7).

**Fig. S6** Evolution of main  $m/z$  markers upon wood injections (biomass-to-catalyst ratio)

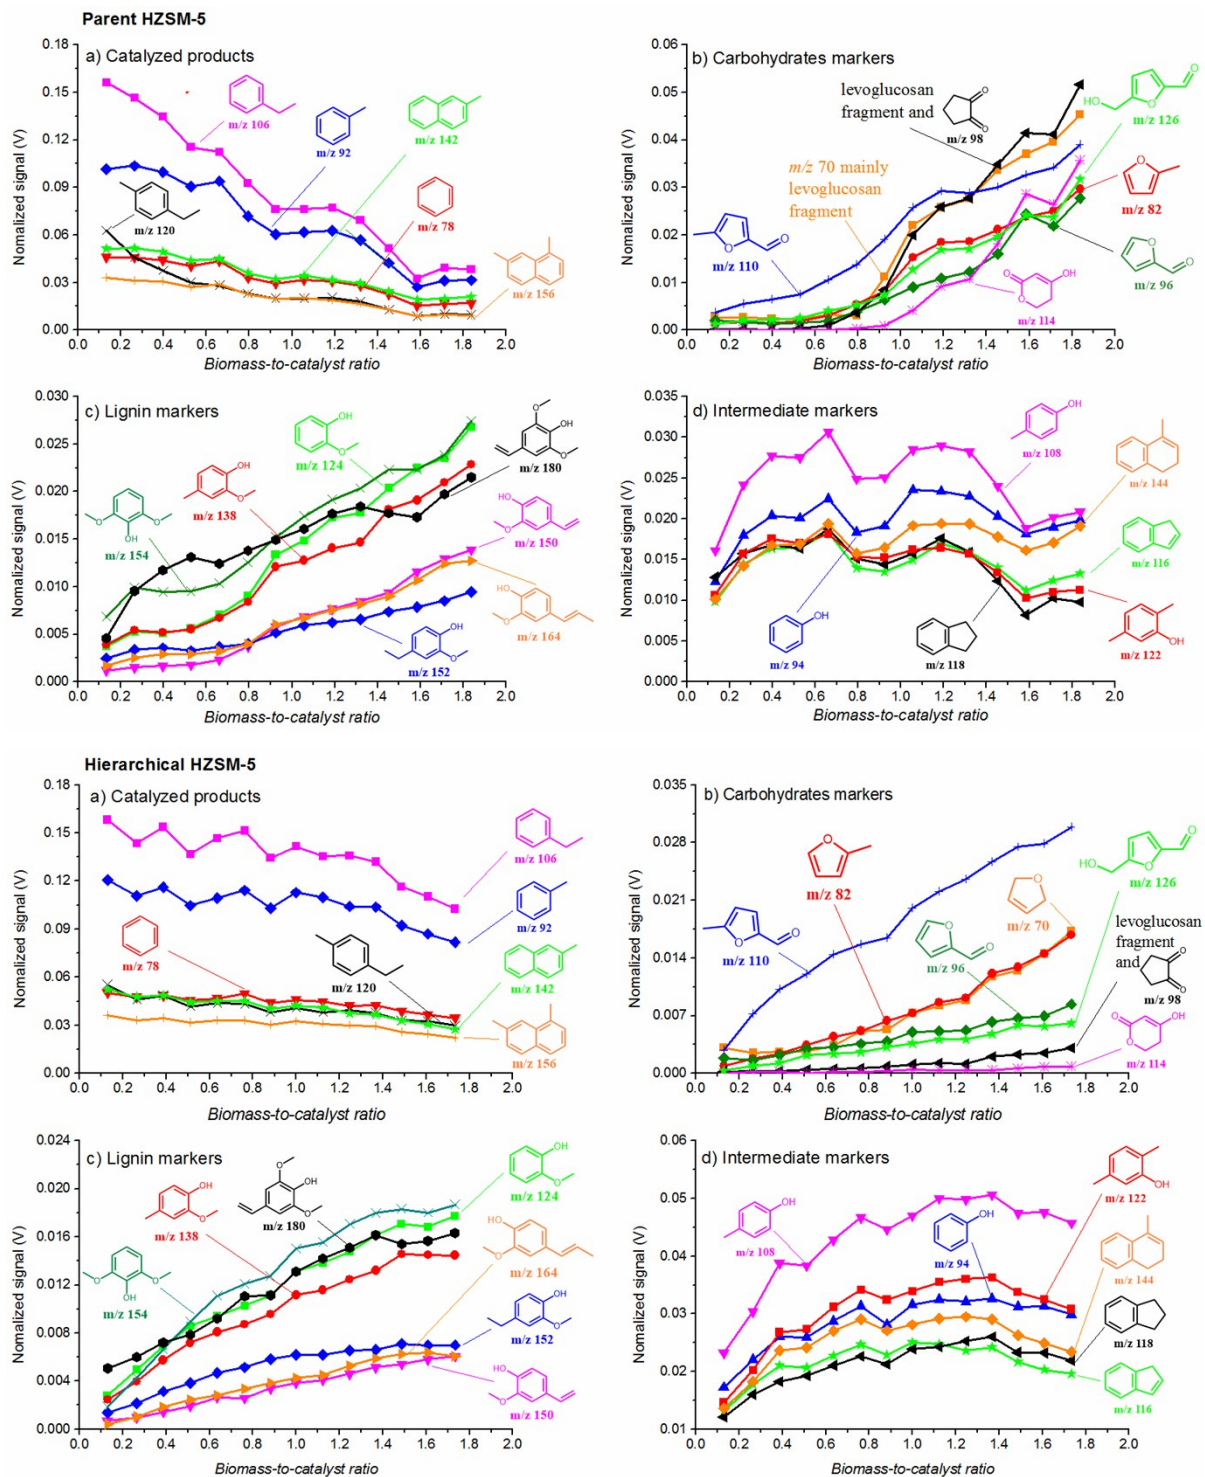



**Fig. S7** Reproducibility on quantitative GC/MS-FID analysis (Parent HZSM-5 after 7 injections of wood, biomass-to-catalyst ratio of 0.85)

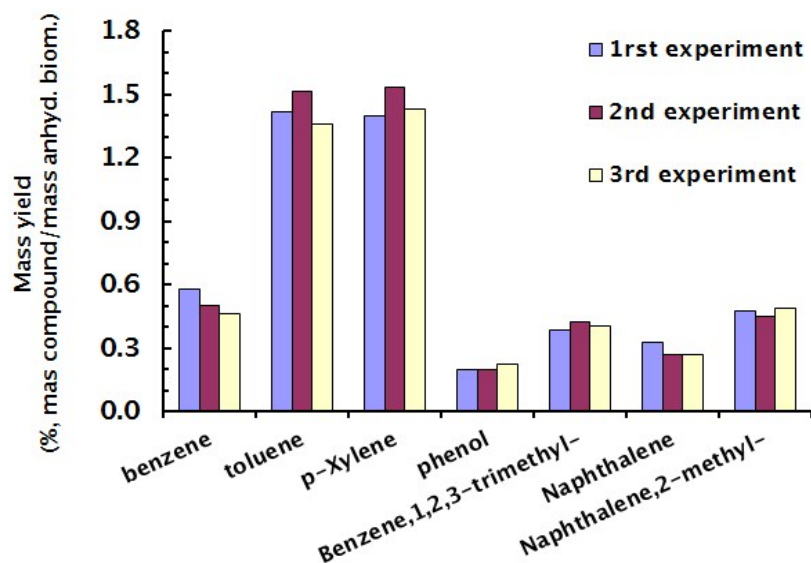

**FigS8.** Mass yield in main products in double fixed bed and reproducibility

A first fixed bed of biomass (85mg) is injected in a preheated furnace (500°C) and vapours are directly up-graded into a 2<sup>nd</sup> fixed bed of zeolite (100mg) pre-heated at 500°C following the same procedure as the pretreatment in microfluidized bed (same temperature program for catalyst activation). The reproducibility is excellent.

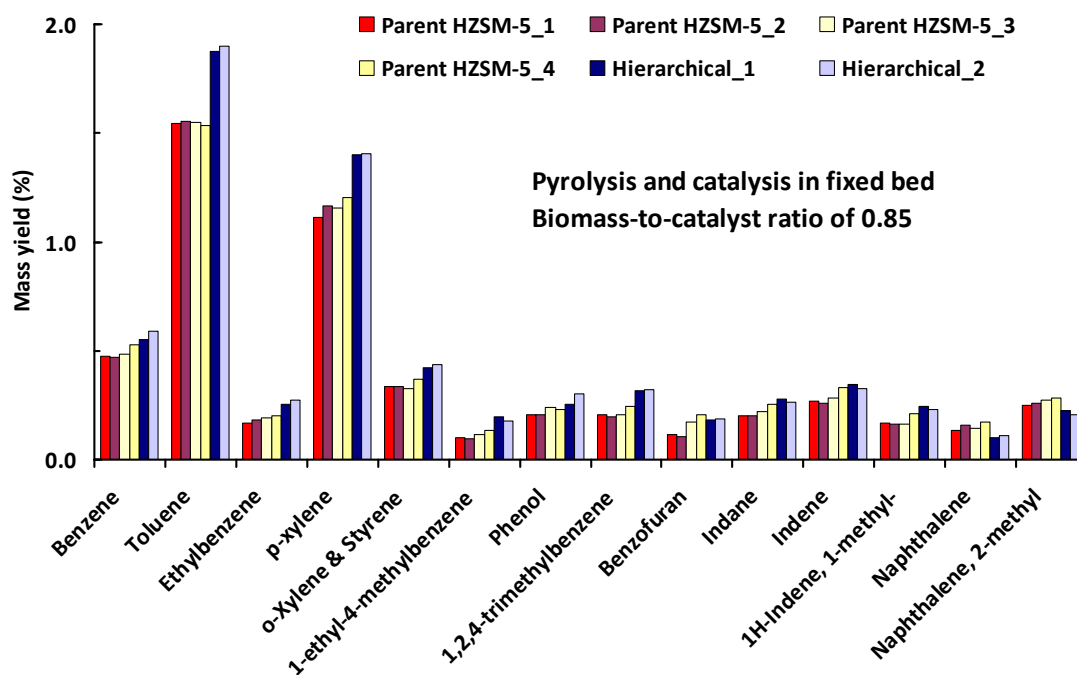

**Fig. S9** Evolution of CO<sub>2</sub>/CO molar ratio as a function of biomass-to-catalyst ratio

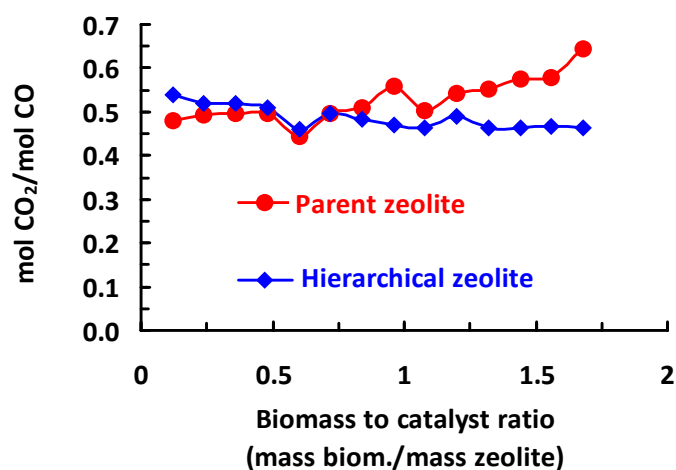

**Fig. S10** Characterization by MALDI-TOF/MS of coke insoluble in CH<sub>2</sub>Cl<sub>2</sub> and recovered after zeolite digestion with HF

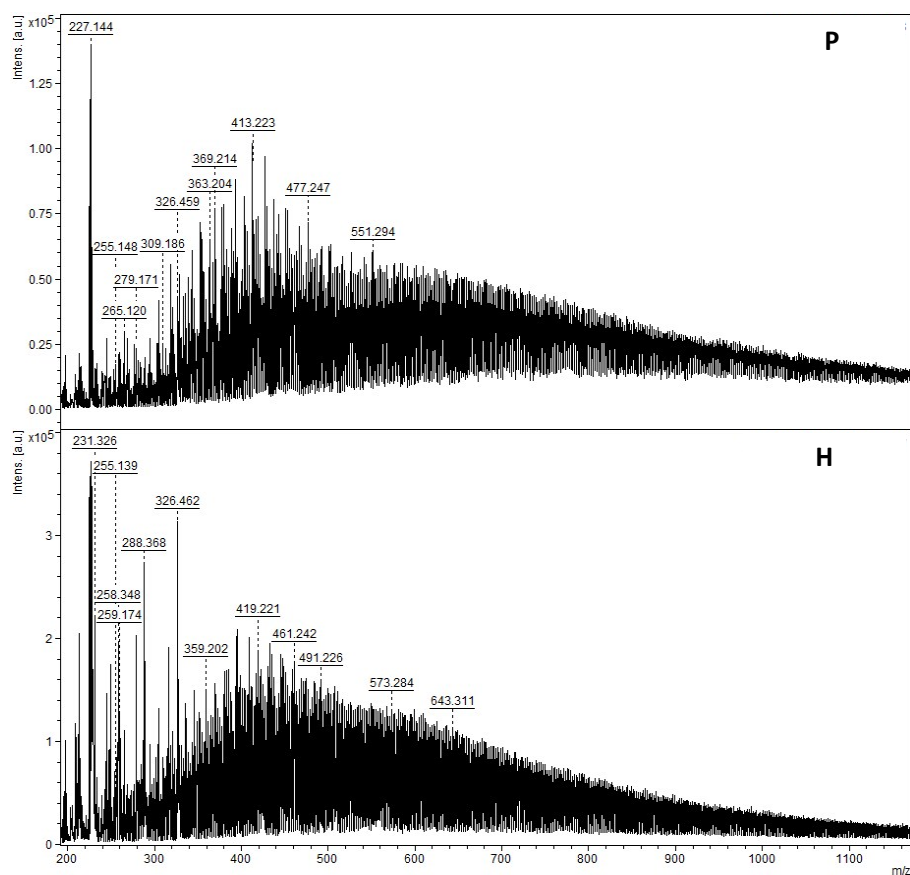

**Video S1** One video taken through the quartz window of the micro-fluidized bed reactor during operation, for bubbling zeolite at 500°C under N<sub>2</sub>, before wood injection (white); one video for bubbling zeolite, under same conditions, after first wood injection: it becomes black.
